# Supplementary material
Source: PubMed Central journal article supplement (PMC6549296)
Supplement: jama-321-2082-s004.pdf [file jama-321-2082-s004.pdf]

Matta MK, Zusterzeel R, Pilli NR, et al. Effect of sunscreen application under maximal use conditions on plasma concentration of sunscreen active ingredients. *JAMA*. doi:10.1001/jama.2019.5586

## **Data Sharing Statement**

### **Data**

**Data available:** Yes

**Data types:** Deidentified participant data

**How to access data:** Deidentified participant data are provided as an online supplement to the manuscript.

**When available:** With publication

### **Supporting Documents**

**Document types:** .csv file; see Supplement 3

### **Additional Information**

**Who can access the data:** Everyone

**Types of analyses:** For any purpose

**Mechanisms of data availability:** No restrictions

**Any additional restrictions:** None
